# Supplementary figures and images for: Coprinus comatuspolysaccharides ameliorated carbon tetrachloride-induced liver fibrosis through modulating inflammation and apoptosis
Source: Royal Society of Chemistry journal article supplement (doi:10.1039/d2fo01349e), 2022-01-01

**Fig.5C**

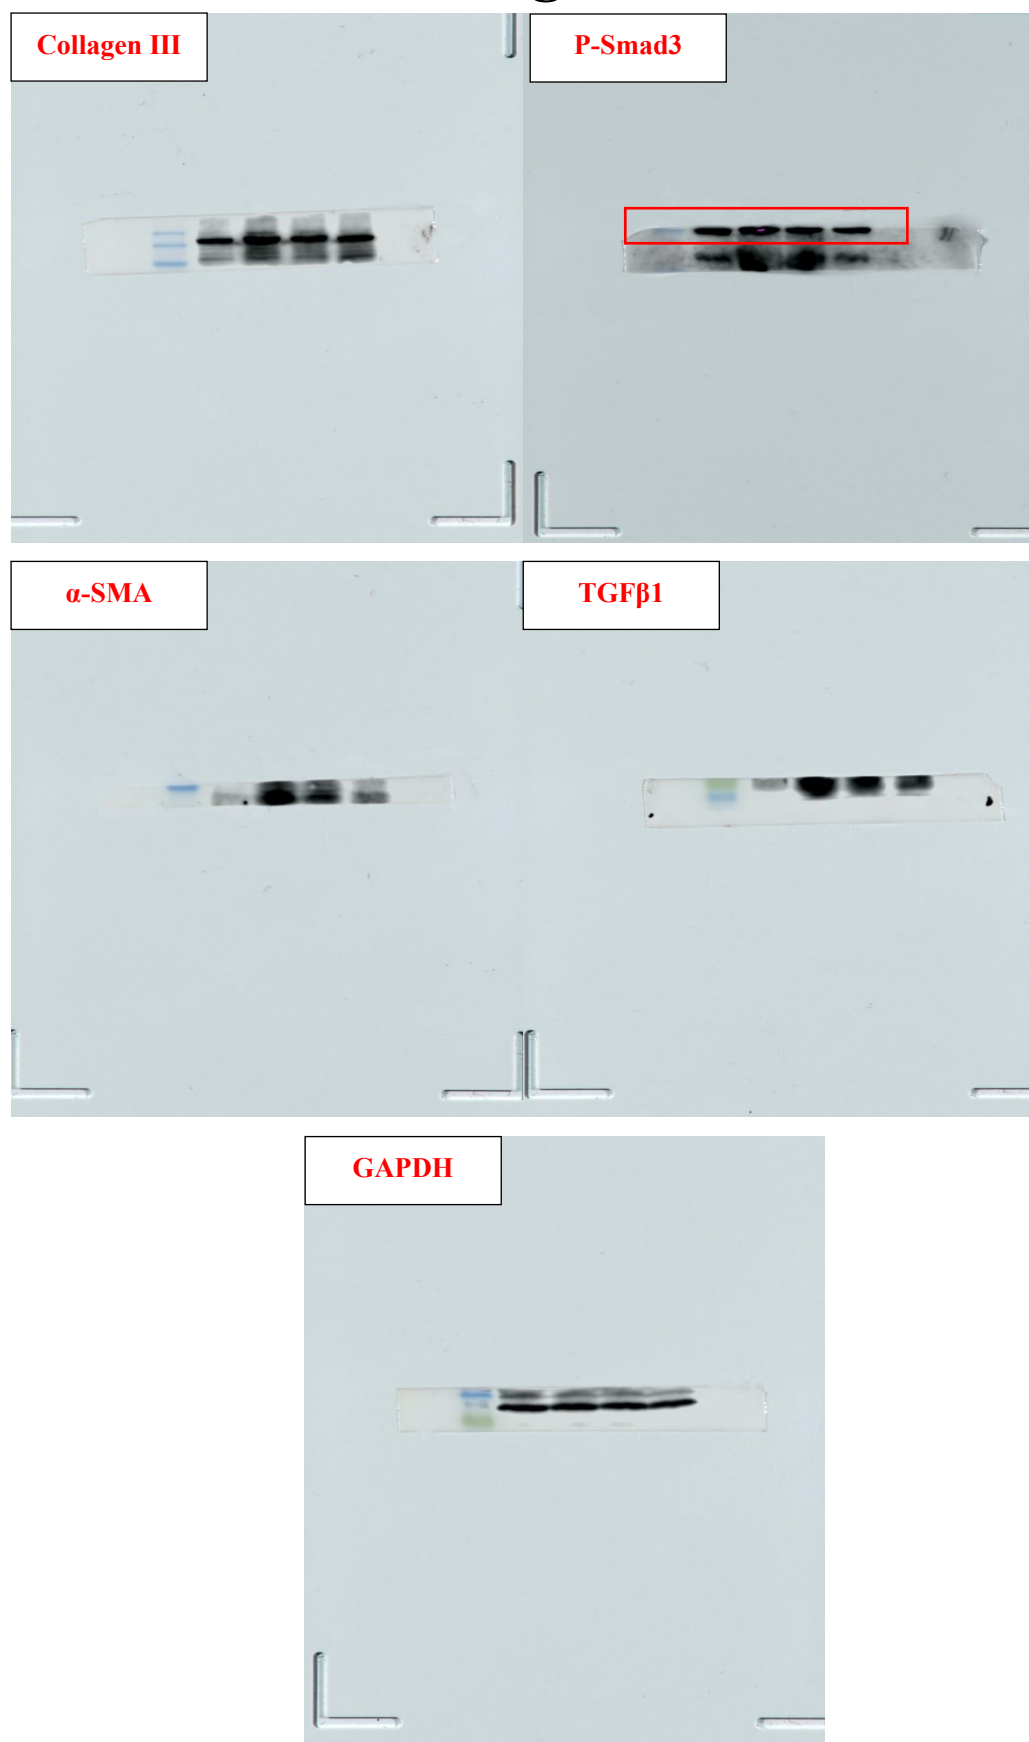

**Fig. 6D**

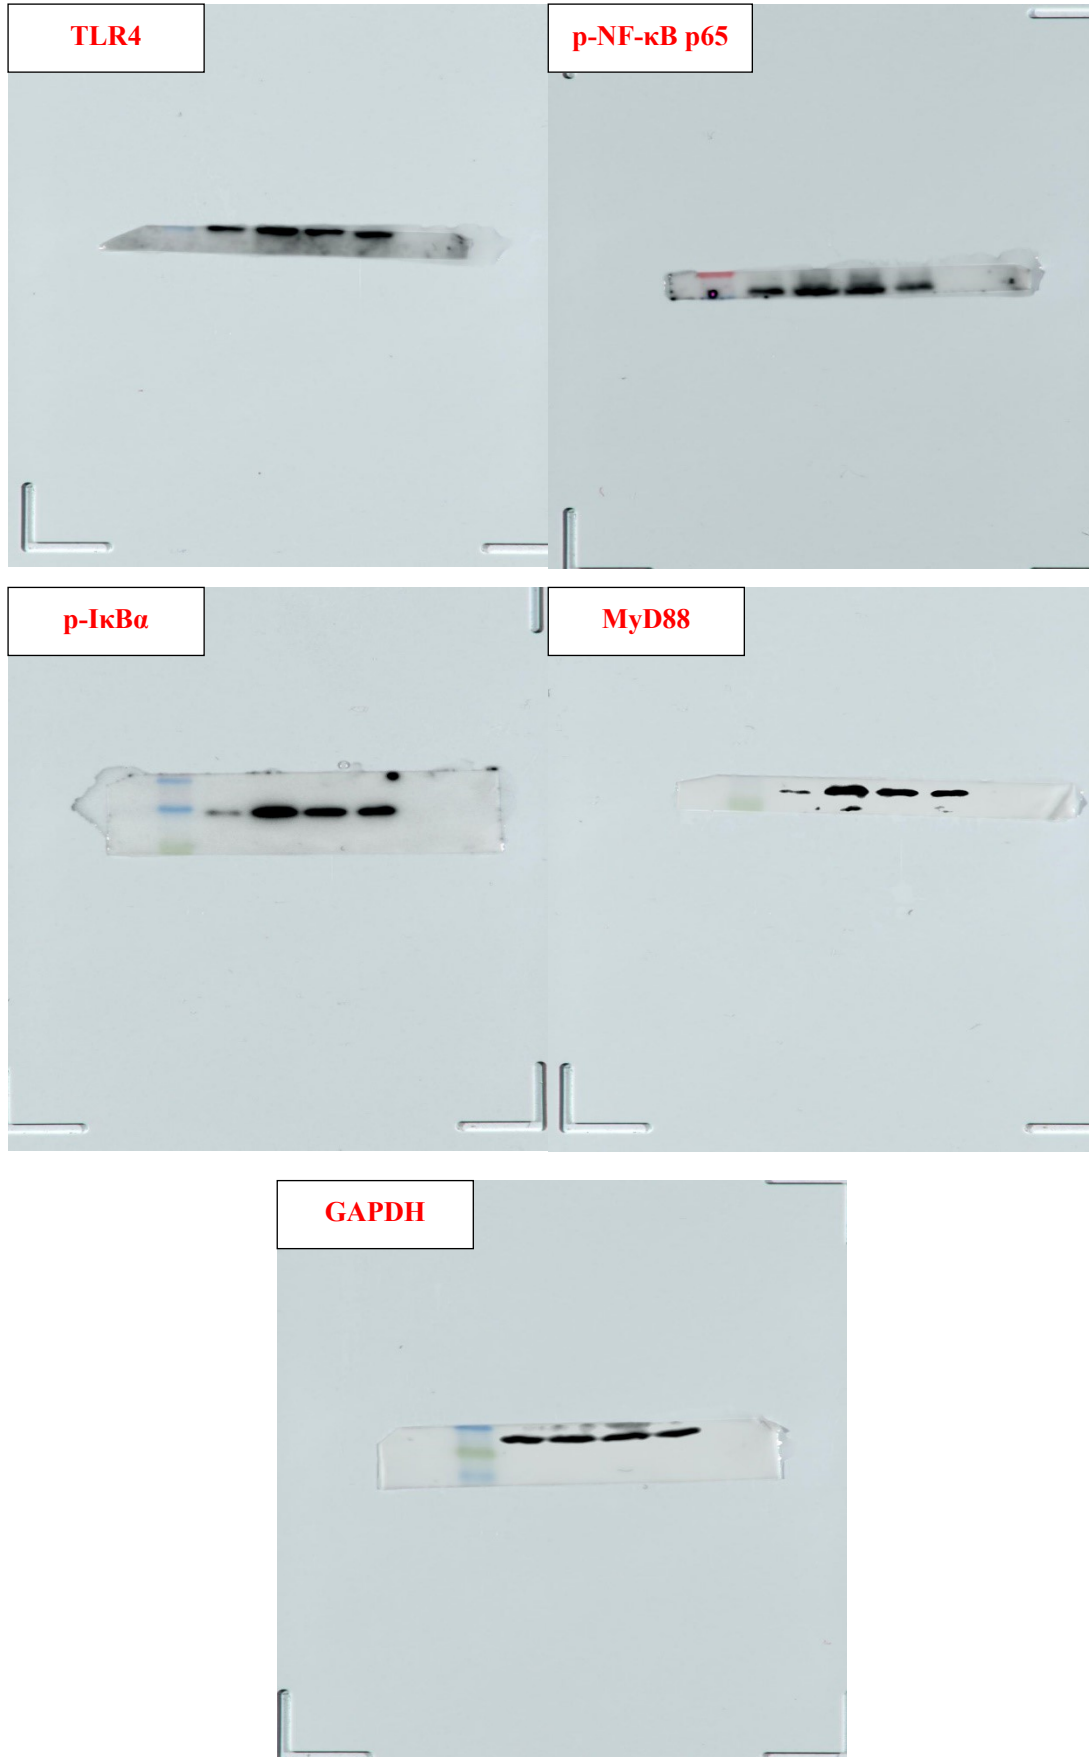

**Fig. 7C**

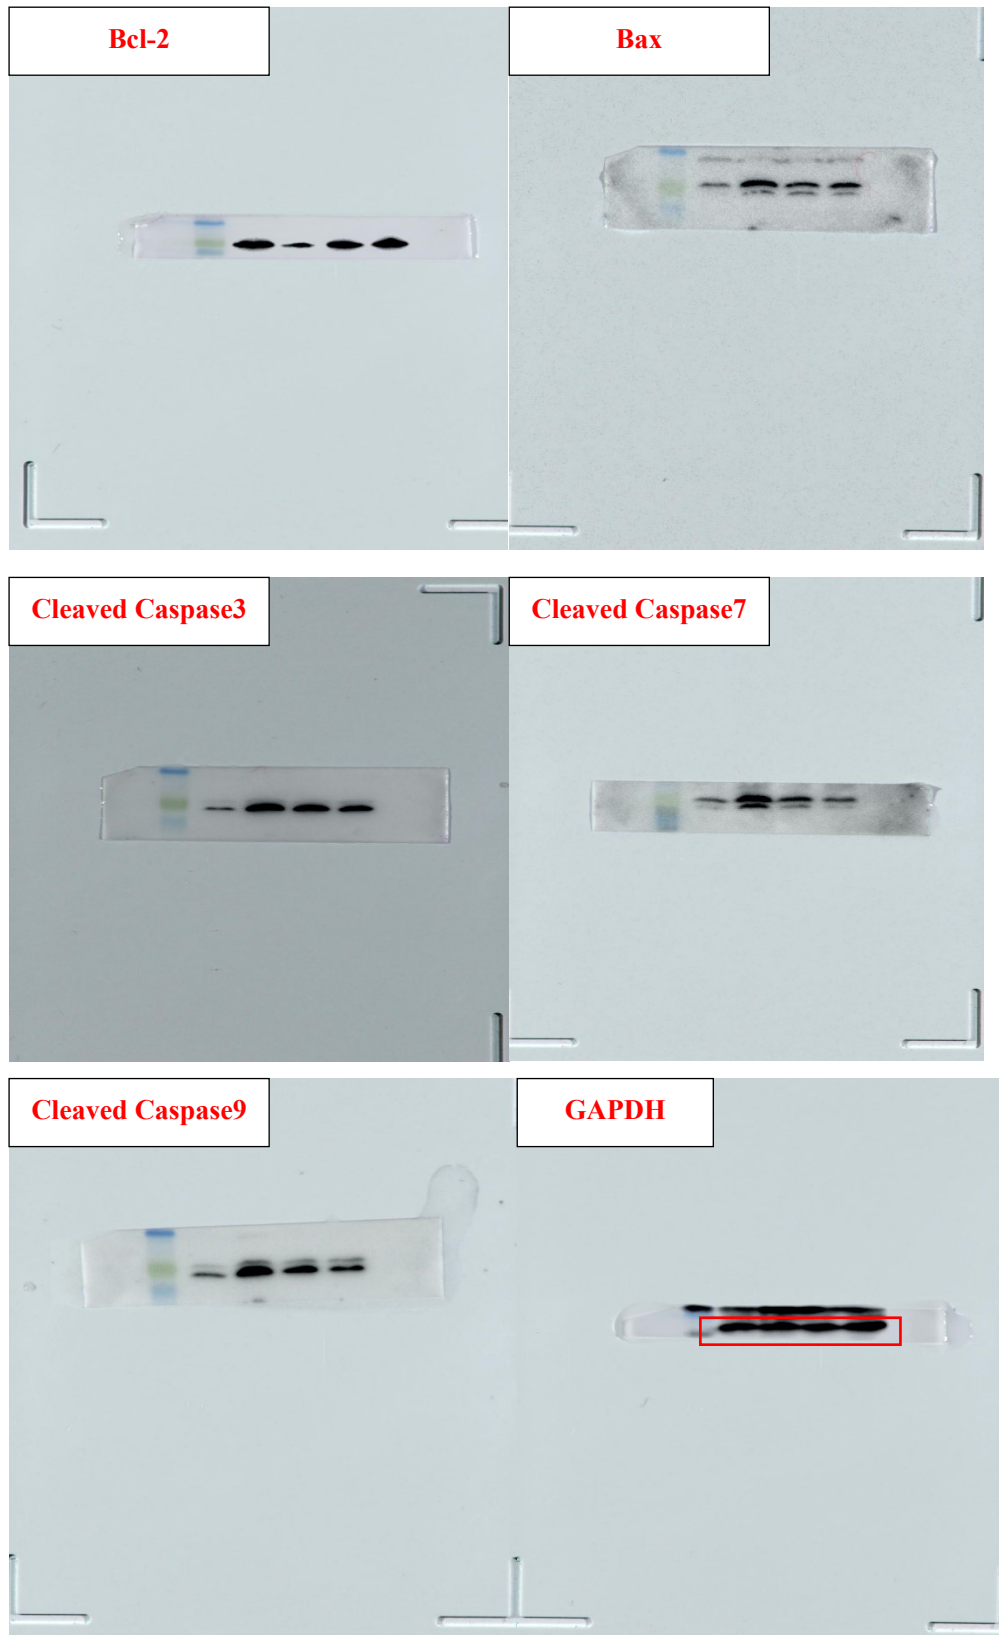

**Fig. 8B**

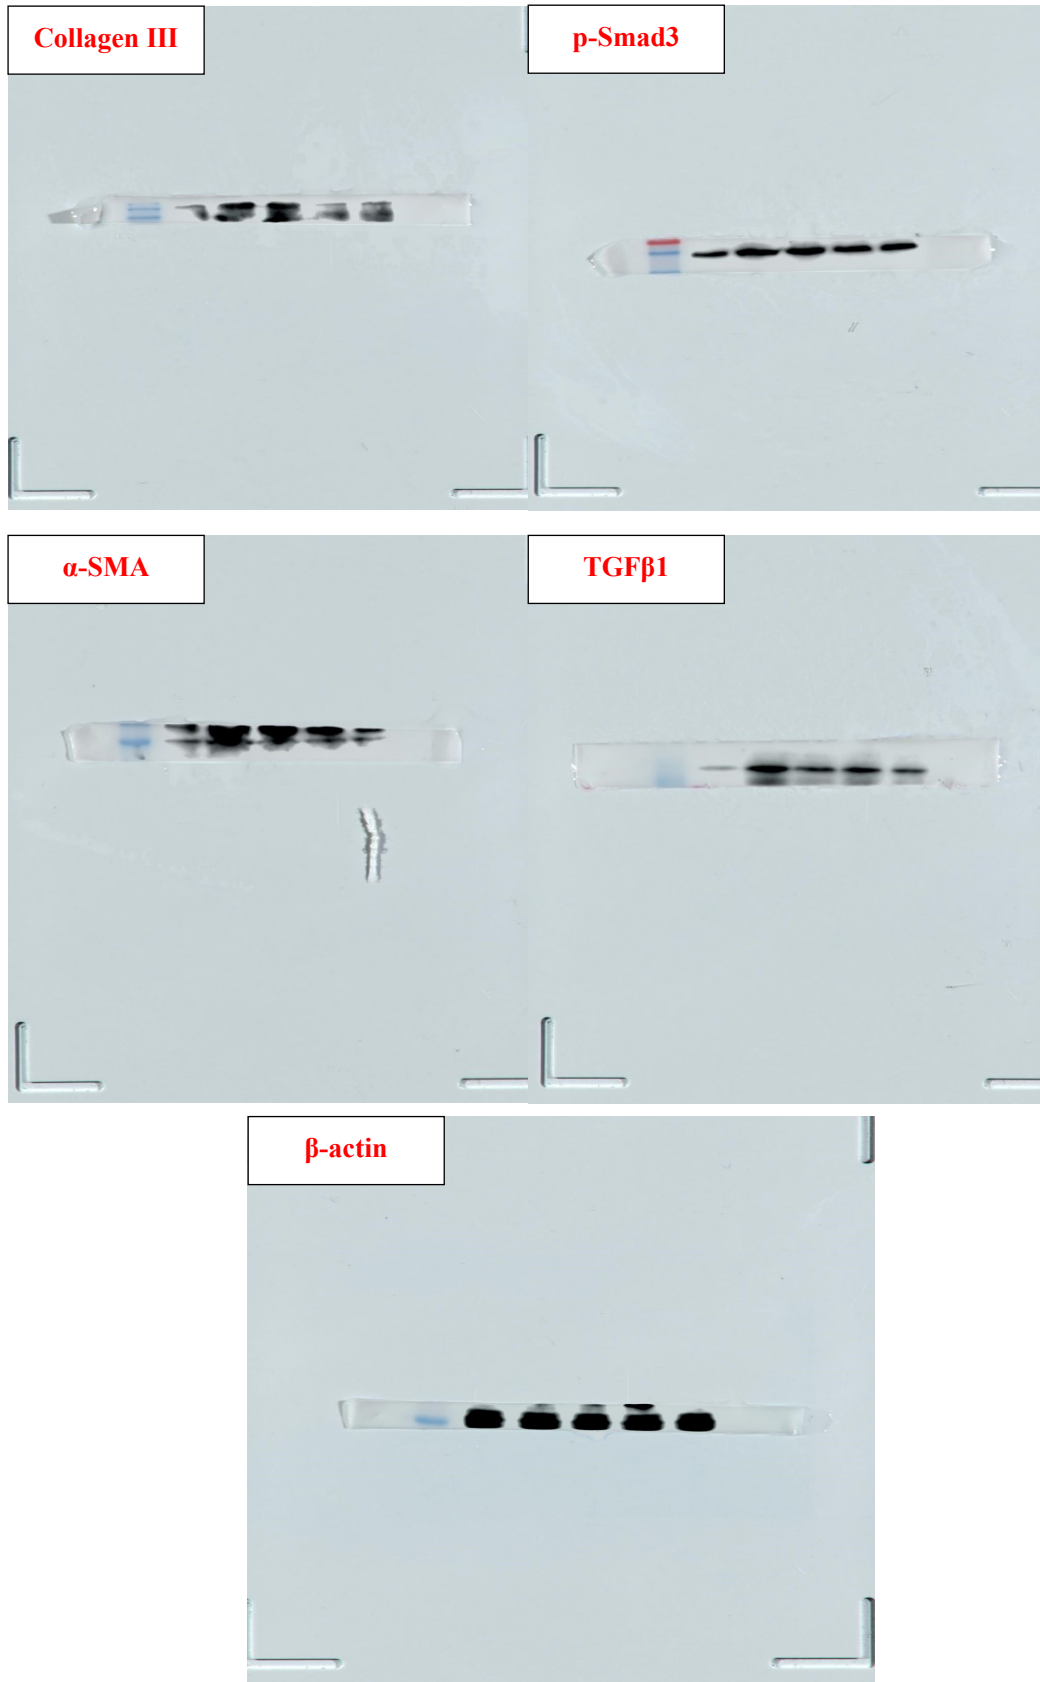

**Fig. 8G**

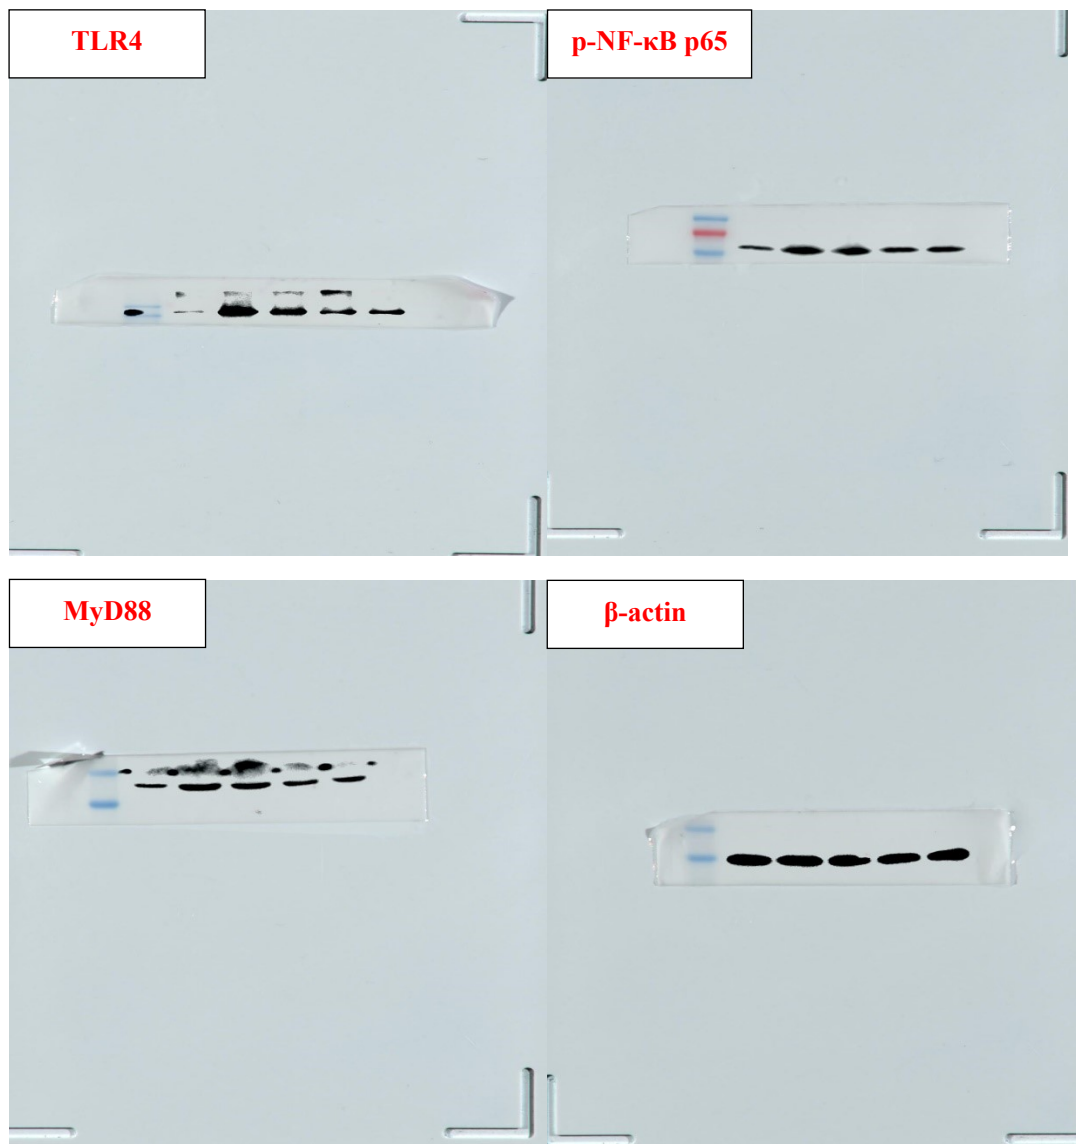

**Fig. 8K**

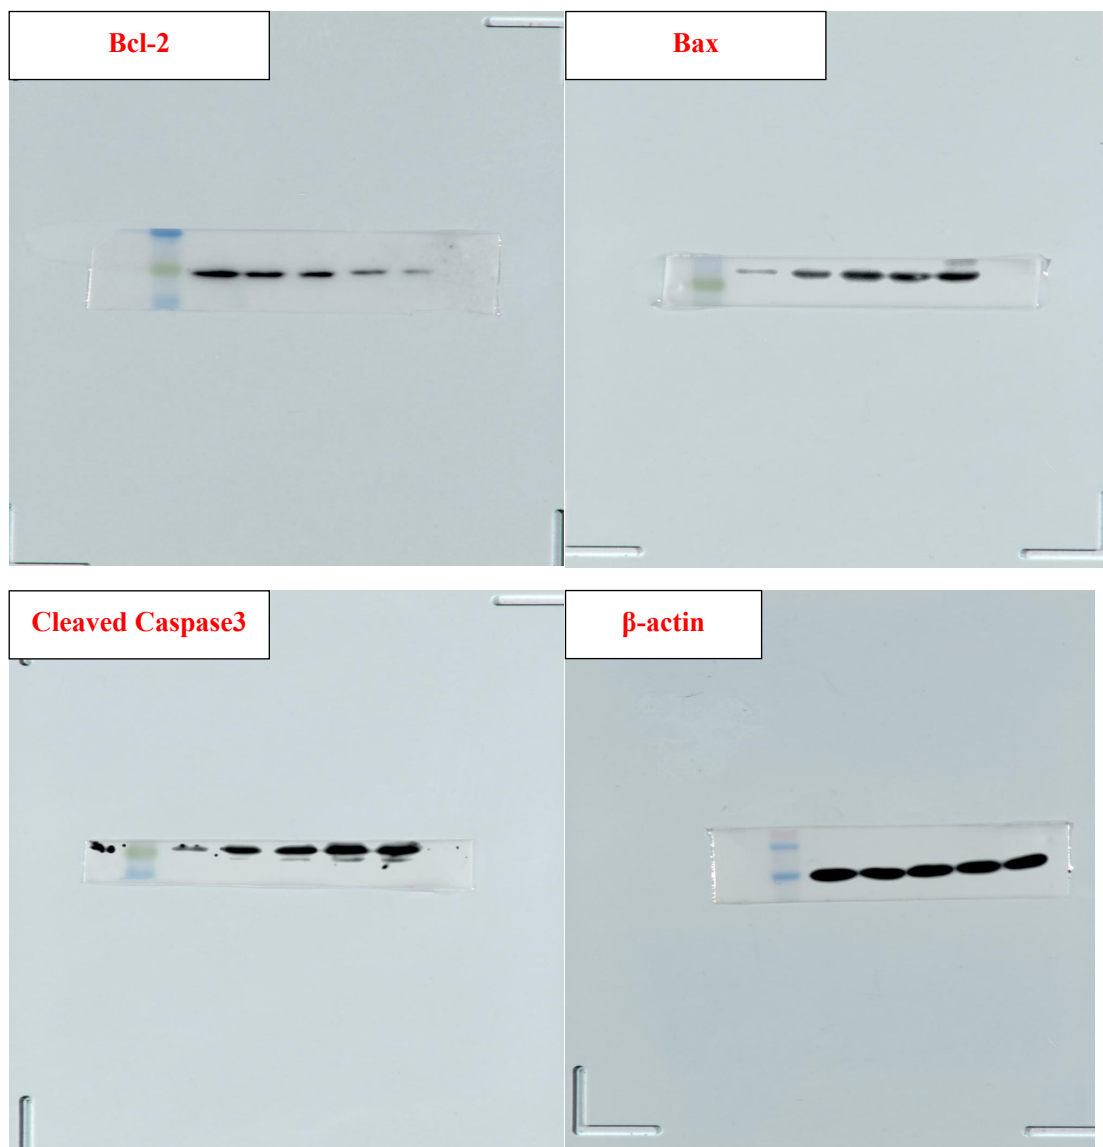

Supplement: d2fo01349e1.pdf [file d2fo01349e1.pdf]
